# Supplementary material for: Binding multidentate ligands to Ni2+: kinetic identification of preferential binding sites
Source: Royal Society of Chemistry journal article supplement (doi:10.1039/c3dt53359j), 2013-12-18
Supplement: c3dt53359j.pdf [file c3dt53359j.pdf]

## **Binding Multidentate Ligands to Ni<sup>2+</sup>: Kinetic Identification of Preferential Binding Sites**

Dilek Nartop\*, William Clegg, Ross W. Harrington, Richard A. Henderson and Corinne Y. Wills

### **SUPPLEMENTARY INFORMATION**

Spectroscopic and Kinetic Data

**Table S1.** The IR and  $^1\text{H}$  NMR spectral characteristics of  $\text{H}_2\text{L}^n_X$ .

| compound                                       | IR                       |           |         | $^1\text{H}$ NMR |                | $^{13}\text{C}\{^1\text{H}\}$ NMR                                                              |
|------------------------------------------------|--------------------------|-----------|---------|------------------|----------------|------------------------------------------------------------------------------------------------|
|                                                | $\nu(\text{C}=\text{N})$ | OH        | CH=N    | Aromatic-H       | $\text{CH}_2$  |                                                                                                |
| $\text{H}_2\text{L}^0_{\text{H}}$              | 1630                     | 13.2 (s)  | 8.4 (s) | 6.7 – 7.3 (m)    | 4.0 (s)        |                                                                                                |
| $\text{H}_2\text{L}^0_{\text{Cl}}$             | 1630                     | n.o.      | 8.3 (s) | 6.9 – 7.3 (m)    | 3.9 (s)        |                                                                                                |
| $\text{H}_2\text{L}^0_{\text{MeO}}^{\text{a}}$ | 1630                     | n.o.      | 7.8 (s) | 6.6 – 6.9 (m)    | 3.8 (s)        |                                                                                                |
| $\text{H}_2\text{L}^0_{\text{Me}}^{\text{b}}$  | 1630                     | n.o.      | 8.3 (s) | 6.8 – 7.3 (m)    | 4.0 (s)        | 167.0 (C-OH)<br>159.0 (C=N)<br>132.0, 131.2, 119.2,<br>127.3, 117.8, 60.0, 21.0                |
| $\text{H}_2\text{L}^1_{\text{H}}$              | 1630                     | 9.95 (br) | 8.5 (s) | 6.9 – 7.3 (m)    | 3.0 (br)       | 166.3 (C-OH)<br>160.9 (C=N)<br>132.5, 130.8, 119.2,<br>118.8, 118.2, 59.8, 49.7                |
| $\text{H}_2\text{L}^2_{\text{H}}$              | 1625                     | 10.7 (br) | 8.3 (s) | 6.7 – 7.3 (m)    | 3.5 – 3.8 (br) | 166.9 (C-OH)<br>161.6 (C=N)<br>132.6, 131.7, 131.2,<br>130.6, 119.2, 58.8,<br>53.2, 52.0       |
| $\text{H}_2\text{L}^3_{\text{H}}$              | 1630                     | 10.6 (br) | 8.3 (s) | 6.7 – 7.3 (m)    | 2.8 – 3.5 (br) | 167.0 (C-OH)<br>162.0 (C=N)<br>133.0, 132.0, 131.0,<br>130.0, 119.0, 59.0,<br>58.0, 54.0, 53.0 |

### Footnotes

s = singlet, m = multiplet, n.o. = not observed

a  $\delta = 3.7$  (s) MeO

b  $\delta = 2.3$  (s) Me

**Table S2.** The IR and  $^1\text{H}$  NMR spectral characteristics of  $[\text{Ni}(\text{L}^n_{\text{H}})]$

| compound                             | IR                       |                      | $^1\text{H}$ -NMR |               |
|--------------------------------------|--------------------------|----------------------|-------------------|---------------|
|                                      | $\nu(\text{C}=\text{N})$ | $\text{CH}=\text{N}$ | Aromatic-H        | $\text{CH}_2$ |
| $[\text{Ni}(\text{L}^0_{\text{H}})]$ | 1600                     | 8.3 (s)              | 6.5 – 7.3 (m)     | 3.2 (br)      |
| $[\text{Ni}(\text{L}^1_{\text{H}})]$ | 1600                     | 8.4 (s)              | 6.6 – 7.7 (m)     | 3.2, 2.8 (br) |
| $[\text{Ni}(\text{L}^2_{\text{H}})]$ | 1600                     | 8.6 (s)              | 6.8 – 7.6 (m)     | 3.0, 2.5 (br) |
| $[\text{Ni}(\text{L}^3_{\text{H}})]$ | 1600                     | 8.5 (s)              | 6.8 – 7.7 (m)     | n.o.          |

Footnotes

s = singlet, m = multiplet, n.o. = not observed

**Table S3.** Kinetic Data for the Reaction of Ni<sup>2+</sup> (0.5 mmol dm<sup>-3</sup>) with H<sub>2</sub>L<sup>a</sup><sub>X</sub> (X = H, Cl or Me) at 25.0 °C in Methanol

| H <sub>2</sub> L <sup>a</sup> <sub>X</sub>                       | [H <sub>2</sub> L <sup>a</sup> <sub>X</sub> ]<br>/ mmol dm <sup>-3</sup> | rate constants                                         |                                                        | spectroscopic changes |                  |                |
|------------------------------------------------------------------|--------------------------------------------------------------------------|--------------------------------------------------------|--------------------------------------------------------|-----------------------|------------------|----------------|
|                                                                  |                                                                          | <i>k</i> <sub>obs</sub> <sup>1</sup> / s <sup>-1</sup> | <i>k</i> <sub>obs</sub> <sup>2</sup> / s <sup>-1</sup> | -ΔA <sub>1</sub>      | -ΔA <sub>2</sub> | A <sub>f</sub> |
| H <sub>2</sub> L <sup>a</sup> <sub>H</sub> <sup>1</sup><br>0.698 | 1.0                                                                      |                                                        | 0.042                                                  |                       | 0.108            |                |
|                                                                  | 2.0                                                                      | 0.060                                                  |                                                        | 0.197                 |                  | 0.960          |
|                                                                  | 3.0                                                                      | 0.076                                                  |                                                        | 0.241                 |                  | 1.320          |
|                                                                  | 4.0                                                                      | 0.098                                                  |                                                        | 0.246                 |                  | 1.663          |
| H <sub>2</sub> L <sup>a</sup> <sub>Me</sub> <sup>2</sup>         | 1.0                                                                      | 0.45                                                   | 0.060                                                  | 0.10                  | 0.14             | 0.665          |
|                                                                  | 2.0                                                                      | 0.53                                                   | 0.060                                                  | 0.18                  | 0.16             | 1.237          |
|                                                                  | 3.0                                                                      | 0.61                                                   | 0.070                                                  | 0.26                  | 0.29             | 1.695          |
|                                                                  | 4.0                                                                      | 0.70                                                   | 0.060                                                  | 0.28                  | 0.28             | 1.830          |
| H <sub>2</sub> L <sup>a</sup> <sub>Cl</sub> <sup>2</sup>         | 1.0                                                                      | 0.55                                                   | 0.20                                                   | 0.10                  | 0.10             | 0.600          |
|                                                                  | 2.0                                                                      | 1.10                                                   | 0.25                                                   | 0.16                  | 0.16             | 1.036          |
|                                                                  | 3.0                                                                      | 1.35                                                   | 0.20                                                   | 0.20                  | 0.19             | 1.475          |
|                                                                  | 4.0                                                                      | 1.93                                                   | 0.22                                                   | 0.24                  | 0.24             | 1.880          |

Fits to absorbance-time curves: ΔA<sub>1</sub> = absorbance change for first phase; -ΔA<sub>2</sub> = absorbance change for second phase; A<sub>f</sub> = final absorbance.

1. single exponential  $A_t = A_f + \Delta A_1 \cdot \exp(-k_{\text{obs}}^1 \cdot t)$
2. two exponentials  $A_t = A_f + \Delta A_1 \cdot \exp(-k_{\text{obs}}^1 \cdot t) + \Delta A_2 \cdot \exp(-k_{\text{obs}}^2 \cdot t)$

**Table S4.** Kinetic Data for the Reaction of Ni<sup>2+</sup> (0.5 mmol dm<sup>-3</sup>) with H<sub>2</sub>L<sub>X</sub>-Cl (X = H, Cl or Me) at 25.0 °C in Methanol

| H <sub>2</sub> L <sub>X</sub> -Cl               | [H <sub>2</sub> L <sub>X</sub> -Cl] / mmol dm <sup>-3</sup> | rate constants                                         |                                                        | spectroscopic changes |                  |                |
|-------------------------------------------------|-------------------------------------------------------------|--------------------------------------------------------|--------------------------------------------------------|-----------------------|------------------|----------------|
|                                                 |                                                             | <i>k</i> <sub>obs</sub> <sup>1</sup> / s <sup>-1</sup> | <i>k</i> <sub>obs</sub> <sup>2</sup> / s <sup>-1</sup> | -ΔA <sub>1</sub>      | -ΔA <sub>2</sub> | A <sub>f</sub> |
| H <sub>2</sub> L <sub>H</sub> -Cl <sup>1</sup>  | 1.0                                                         | 0.12                                                   |                                                        | 0.210                 |                  | 0.483          |
|                                                 | 2.0                                                         | 0.12                                                   |                                                        | 0.294                 |                  | 0.653          |
|                                                 | 3.0                                                         | 0.13                                                   |                                                        | 0.367                 |                  | 0.957          |
|                                                 | 4.0                                                         | 0.13                                                   |                                                        | 0.444                 |                  | 1.377          |
| H <sub>2</sub> L <sub>Me</sub> -Cl <sup>1</sup> | 1.0                                                         | 0.033                                                  |                                                        | 0.268                 |                  | 0.359          |
|                                                 | 2.0                                                         | 0.052                                                  |                                                        | 0.369                 |                  | 0.765          |
|                                                 | 3.0                                                         | 0.070                                                  |                                                        | 0.425                 |                  | 1.118          |
|                                                 | 4.0                                                         | 0.090                                                  |                                                        | 0.439                 |                  | 1.558          |
| H <sub>2</sub> L <sub>Cl</sub> -Cl <sup>2</sup> | 1.0                                                         | 0.26                                                   | 0.03                                                   | 0.070                 | 0.13             | 0.265          |
|                                                 | 2.0                                                         | 0.29                                                   | 0.03                                                   | 0.256                 | 0.260            | 0.650          |
|                                                 | 3.0                                                         | 0.32                                                   | 0.04                                                   | 0.400                 | 0.490            | 1.13           |
|                                                 | 4.0                                                         | 0.35                                                   | 0.04                                                   | 0.413                 | 0.673            | 1.43           |

Fits to absorbance-time curves: ΔA<sub>1</sub> = absorbance change for first phase; -ΔA<sub>2</sub> = absorbance change for second phase; A<sub>f</sub> = final absorbance.

1. single exponential  $A_t = A_f + \Delta A_1 \cdot \exp(-k_{\text{obs}}^1 \cdot t)$
2. two exponentials  $A_t = A_f + \Delta A_1 \cdot \exp(-k_{\text{obs}}^1 \cdot t) + \Delta A_2 \cdot \exp(-k_{\text{obs}}^2 \cdot t)$

**Table S5.** Kinetic Data for the Reaction of Ni<sup>2+</sup> (0.5 mmol dm<sup>-3</sup>) with H<sub>2</sub>L<sup>0</sup><sub>X</sub> (X = H, MeO, Me or Cl) and H<sub>2</sub>salphen at 25.0 °C in Methanol

| ligand                                                           | [ligand]<br>/ mmol dm <sup>-3</sup> |     | rate constants                                         |  | spectroscopic changes |                |
|------------------------------------------------------------------|-------------------------------------|-----|--------------------------------------------------------|--|-----------------------|----------------|
|                                                                  |                                     |     | <i>k</i> <sub>obs</sub> <sup>1</sup> / s <sup>-1</sup> |  | -ΔA <sub>1</sub>      | A <sub>f</sub> |
| H <sub>2</sub> L <sup>0</sup> <sub>H</sub> <sup>1</sup><br>0.755 | 1.0                                 | 1.0 | 0.29                                                   |  | 0.320                 |                |
|                                                                  | 2.0                                 |     | 0.35                                                   |  | 0.357                 | 0.916          |
|                                                                  | 3.0                                 |     | 0.40                                                   |  | 0.435                 | 1.269          |
|                                                                  | 4.0                                 |     | 0.49                                                   |  | 0.480                 | 1.640          |
| H <sub>2</sub> L <sup>0</sup> <sub>MeO</sub> <sup>1</sup>        | 1.0                                 |     | 0.019                                                  |  | 0.020                 | 0.096          |
|                                                                  | 2.0                                 |     | 0.025                                                  |  | 0.035                 | 0.104          |
|                                                                  | 3.0                                 |     | 0.029                                                  |  | 0.049                 | 0.218          |
|                                                                  | 4.0                                 |     | 0.036                                                  |  | 0.059                 | 0.500          |
| H <sub>2</sub> L <sup>0</sup> <sub>MeO</sub> <sup>1, a</sup>     | 2.0                                 |     | 0.025                                                  |  | 0.015                 | 0.036          |
|                                                                  | 3.0                                 |     | 0.031                                                  |  | 0.019                 | 0.060          |
|                                                                  | 4.0                                 |     | 0.035                                                  |  | 0.022                 | 0.073          |
| H <sub>2</sub> L <sup>0</sup> <sub>Me</sub><br>0.076             | 1                                   | 0.5 | 0.019                                                  |  | 0.020                 |                |
|                                                                  | 1.0                                 |     | 0.020                                                  |  | 0.029                 | 0.092          |
|                                                                  | 1.5                                 |     | 0.021                                                  |  | 0.048                 | 0.152          |
|                                                                  | 2.0                                 |     | 0.022                                                  |  | 0.053                 | 0.179          |
| H <sub>2</sub> L <sup>0</sup> <sub>Cl</sub> <sup>1</sup>         | 1.0                                 |     | 0.025                                                  |  | 0.040                 | 0.094          |
|                                                                  | 2.0                                 |     | 0.036                                                  |  | 0.055                 | 0.177          |
|                                                                  | 3.0                                 |     | 0.050                                                  |  | 0.080                 | 0.270          |
|                                                                  | 4.0                                 |     | 0.064                                                  |  | 0.120                 | 0.381          |
| H <sub>2</sub> salphen <sup>1</sup>                              | 1.0                                 |     | 0.015                                                  |  | 0.046                 | 0.176          |
|                                                                  | 2.0                                 |     | 0.018                                                  |  | 0.111                 | 0.199          |
|                                                                  | 3.0                                 |     | 0.023                                                  |  | 0.148                 | 0.232          |

Fits to absorbance-time curves: ΔA<sub>1</sub> = absorbance change for first phase; A<sub>f</sub> = final absorbance.

1. single exponential  $A_t = A_f + \Delta A_1 \cdot \exp(-k_{\text{obs}}^1 \cdot t)$

Footnotes

a [Ni<sup>2+</sup>] = 0.2 mmol dm<sup>-3</sup>

**Table S6.** Kinetic Data for the Reaction of Ni<sup>2+</sup> (0.5 mmol dm<sup>-3</sup>) with H<sub>2</sub>L<sup>n</sup><sub>H</sub> (n = 1 - 3) at 25.0 °C in Methanol

| H <sub>2</sub> L <sup>n</sup> <sub>H</sub>                       | [H <sub>2</sub> L <sup>n</sup> <sub>H</sub> ]<br>/ mmol dm <sup>-3</sup> | rate constants                                         |                                                        | spectroscopic changes |                  |                |
|------------------------------------------------------------------|--------------------------------------------------------------------------|--------------------------------------------------------|--------------------------------------------------------|-----------------------|------------------|----------------|
|                                                                  |                                                                          | <i>k</i> <sub>obs</sub> <sup>1</sup> / s <sup>-1</sup> | <i>k</i> <sub>obs</sub> <sup>2</sup> / s <sup>-1</sup> | -ΔA <sub>1</sub>      | -ΔA <sub>2</sub> | A <sub>f</sub> |
| H <sub>2</sub> L <sup>1</sup> <sub>H</sub> <sup>1</sup><br>0.816 | 2.0                                                                      | 2.3                                                    | 0.040                                                  | 0.380                 | 0.169            |                |
|                                                                  | 4.0                                                                      | 4.1                                                    | 0.040                                                  | 0.448                 | 0.156            | 1.031          |
|                                                                  | 6.0                                                                      | 6.5                                                    | 0.035                                                  | 0.472                 | 0.123            | 1.239          |
|                                                                  | 10.0                                                                     | 11.8                                                   | 0.035                                                  | 0.438                 | 0.099            | 1.577          |
|                                                                  | 12.0                                                                     | 12.4                                                   | 0.040                                                  | 0.484                 | 0.100            | 1.728          |
|                                                                  | 15.0                                                                     | 16.5                                                   | 0.040                                                  | 0.429                 | 0.100            | 1.975          |
| H <sub>2</sub> L <sup>2</sup> <sub>H</sub> <sup>1</sup><br>0.248 | 2.0                                                                      | 3.0                                                    | 0.050                                                  | 0.126                 | 0.060            |                |
|                                                                  | 4.0                                                                      | 6.0                                                    | 0.050                                                  | 0.116                 | 0.078            | 0.534          |
|                                                                  | 6.0                                                                      | 8.0                                                    | 0.040                                                  | 0.100                 | 0.050            | 0.677          |
|                                                                  | 10.0                                                                     | 11.8                                                   | 0.050                                                  | 0.128                 | 0.074            | 0.773          |
|                                                                  | 12.0                                                                     | 14.1                                                   | 0.050                                                  | 0.108                 | 0.070            | 1.052          |
|                                                                  | 15.0                                                                     | 18.0                                                   | 0.050                                                  | 0.110                 | 0.074            | 1.368          |
| H <sub>2</sub> L <sup>3</sup> <sub>H</sub> <sup>1</sup><br>0.398 | 2.0                                                                      | 3.8                                                    | 0.010                                                  | 0.133                 | 0.099            |                |
|                                                                  | 4.0                                                                      | 6.7                                                    | 0.010                                                  | 0.206                 | 0.050            | 0.561          |
|                                                                  | 6.0                                                                      | 8.5                                                    | 0.015                                                  | 0.214                 | 0.045            | 0.866          |
|                                                                  | 10.0                                                                     | 13.8                                                   | 0.010                                                  | 0.207                 | 0.048            | 1.238          |
|                                                                  | 12.0                                                                     | 17.5                                                   | 0.010                                                  | 0.200                 | 0.042            | 1.423          |
|                                                                  | 15.0                                                                     | 21.8                                                   | 0.010                                                  | 0.200                 | 0.040            | 1.488          |

Fits to absorbance-time curves: ΔA<sub>1</sub> = absorbance change for first phase; -ΔA<sub>2</sub> = absorbance change for second phase; A<sub>f</sub> = final absorbance.

1. two exponentials  $A_t = A_f + \Delta A_1 \cdot \exp(-k_{\text{obs}}^1 \cdot t) + \Delta A_2 \cdot \exp(-k_{\text{obs}}^2 \cdot t)$



**Table S7.** Kinetic Data for the Reaction of Ni<sup>2+</sup> (0.5 mmol dm<sup>-3</sup>) with L<sub>py</sub> or L<sub>py</sub><sup>n</sup> (n = 1 - 3) at 25.0 °C in Methanol

| ligand                                    | [ligand]<br>/ mmol dm <sup>-3</sup> | rate constants                            | spectroscopic changes |                |
|-------------------------------------------|-------------------------------------|-------------------------------------------|-----------------------|----------------|
|                                           |                                     | <i>k</i> <sub>obs</sub> / s <sup>-1</sup> | -ΔA <sub>1</sub>      | A <sub>f</sub> |
| L <sub>py</sub> <sup>1</sup>              | 5.0                                 | 5.6                                       | 0.015                 | 0.0460         |
|                                           | 6.0                                 | 5.6                                       | 0.017                 | 0.0500         |
|                                           | 9.0                                 | 6.8                                       | 0.018                 | 0.0518         |
|                                           | 12.5                                | 12.4                                      | 0.020                 | 0.0559         |
|                                           | 15.0                                | 14.6                                      | 0.019                 | 0.0600         |
|                                           | 20.0                                | 16.4                                      | 0.020                 | 0.0647         |
|                                           | 25.0                                | 19.4                                      | 0.018                 | 0.0724         |
| L <sub>py</sub> <sup>0</sup> <sup>1</sup> | 5.0                                 | 12.0                                      | 0.0249                | 0.041          |
|                                           | 10.0                                | 26.3                                      | 0.0244                | 0.048          |
|                                           | 15.0                                | 46.3                                      | 0.0247                | 0.067          |
|                                           | 20.0                                | 63.6                                      | 0.0242                | 0.092          |
|                                           | 25.0                                | 76.9                                      | 0.0242                | 0.121          |
|                                           | 30.0                                | 100.7                                     | 0.0255                | 0.156          |
| L <sub>py</sub> <sup>1</sup> <sup>1</sup> | 5.0                                 | 18.0                                      | 0.0263                | 0.066          |
|                                           | 10.0                                | 38.6                                      | 0.0262                | 0.104          |
|                                           | 15.0                                | 71.4                                      | 0.0260                | 0.143          |
|                                           | 20.0                                | 89.9                                      | 0.0268                | 0.184          |
|                                           | 25.0                                | 111.9                                     | 0.0272                | 0.215          |
|                                           | 30.0                                | 124.4                                     | 0.0273                | 0.253          |
| L <sub>py</sub> <sup>2</sup> <sup>1</sup> | 5.0                                 | 20.4                                      | 0.0213                | 0.038          |
|                                           | 10.0                                | 43.7                                      | 0.0260                | 0.047          |
|                                           | 15.0                                | 70.8                                      | 0.0260                | 0.062          |
|                                           | 20.0                                | 99.7                                      | 0.0260                | 0.126          |
|                                           | 25.0                                | 121.4                                     | 0.0300                | 0.202          |
|                                           | 30.0                                | 140.7                                     | 0.0300                | 0.269          |
| L <sub>py</sub> <sup>3</sup> <sup>1</sup> | 5.0                                 | 17.9                                      | 0.0215                | 0.059          |
|                                           | 10.0                                | 42.7                                      | 0.0219                | 0.091          |
|                                           | 15.0                                | 67.6                                      | 0.0229                | 0.120          |
|                                           | 20.0                                | 106.7                                     | 0.0230                | 0.157          |
|                                           | 25.0                                | 143.8                                     | 0.0240                | 0.225          |
|                                           | 30.0                                | 164.3                                     | 0.0244                | 0.225          |

Fits to absorbance-time curves:  $\Delta A_1$  = absorbance change for first phase;  $-\Delta A_2$  = absorbance change for second phase;  $A_f$  = final absorbance.

1. single exponential  $A_t = A_f + \Delta A_1 \cdot \exp(-k_{\text{obs}} \cdot t)$

**Table S8.** Kinetic Data for the Reaction of  $\text{Ni}^{2+}$  ( $0.5 \text{ mmol dm}^{-3}$ ) with  $\text{H}_2\text{L}^0_{\text{H}}$  in the presence of  $\text{NEt}_3$  and  $\text{NHEt}_3^+$  at  $25.0 \text{ }^\circ\text{C}$  in Methanol

|                                   | $[\text{H}_2\text{L}^0_{\text{H}}]$<br>/ $\text{mmol dm}^{-3}$ | $[\text{NEt}_3]$<br>/ $\text{mmol dm}^{-3}$ | $[\text{NHEt}_3^+]$<br>/ $\text{mmol dm}^{-3}$ | rate constants                     |                                    | spectroscopic changes |               |           |
|-----------------------------------|----------------------------------------------------------------|---------------------------------------------|------------------------------------------------|------------------------------------|------------------------------------|-----------------------|---------------|-----------|
|                                   |                                                                |                                             |                                                | $k_{\text{obs}}^1 / \text{s}^{-1}$ | $k_{\text{obs}}^2 / \text{s}^{-1}$ | $-\Delta A_1$         | $-\Delta A_2$ | $A_f$     |
| $\text{H}_2\text{L}^0_{\text{H}}$ | 2.5                                                            | 20.0                                        | 0.0                                            | 120                                | 21.5                               | 0.170                 | 0.091         | $0.706^1$ |
|                                   | 2.5                                                            | 20.0                                        | 1.0                                            | 72                                 | 21.0                               | 0.133                 | 0.138         | $0.717^1$ |
|                                   | 2.5                                                            | 20.0                                        | 2.5                                            | 48                                 | 20.7                               | 0.071                 | 0.199         | $0.730^1$ |
|                                   | 2.5                                                            | 20.0                                        | 5.0                                            | 24                                 |                                    | 0.268                 |               | $0.718^2$ |
|                                   | 2.5                                                            | 20.0                                        | 10.0                                           | 9.9                                |                                    | 0.280                 |               | $0.727^2$ |
|                                   | 2.5                                                            | 20.0                                        | 20.0                                           | 6.1                                |                                    | 0.279                 |               | $0.731^2$ |
|                                   | 2.5                                                            | 20.0                                        | 30.0                                           | 4.8                                |                                    | 0.280                 |               | $0.723^2$ |
|                                   | 2.5                                                            | 10.0                                        | 0.0                                            | 118                                | 21.0                               | 0.088                 | 0.143         | $0.708^1$ |
|                                   | 2.5                                                            | 10.0                                        | 1.0                                            | 59                                 | 19.5                               | 0.077                 | 0.192         | $0.772^1$ |
|                                   | 2.5                                                            | 10.0                                        | 2.5                                            | 21.2                               |                                    | 0.231                 |               | $0.752^2$ |
|                                   | 2.5                                                            | 10.0                                        | 5.0                                            | 9.2                                |                                    | 0.233                 |               | $0.756^2$ |
|                                   | 2.5                                                            | 10.0                                        | 10.0                                           | 6.4                                |                                    | 0.234                 |               | $0.747^2$ |
|                                   | 2.5                                                            | 10.0                                        | 20.0                                           | 4.9                                |                                    | 0.227                 |               | $0.743^2$ |
|                                   | 2.5                                                            | 10.0                                        | 30.0                                           | 3.2                                |                                    | 0.213                 |               | $0.735^2$ |
|                                   | 1.0                                                            | 10.0                                        | 20.0                                           | 1.6                                |                                    | 0.248                 |               | $0.750^2$ |
|                                   | 2.5                                                            | 10.0                                        | 20.0                                           | 3.8                                |                                    | 0.250                 |               | $0.893^2$ |
|                                   | 3.5                                                            | 10.0                                        | 20.0                                           | 5.1                                |                                    | 0.260                 |               | $1.282^2$ |
|                                   | 4.0                                                            | 10.0                                        | 20.0                                           | 6.5                                |                                    | 0.260                 |               | $1.650^2$ |

Fits to absorbance-time curves:  $\Delta A_1$  = absorbance change for first phase;  $-\Delta A_2$  = absorbance change for second phase;  $A_f$  = final absorbance.

- two exponentials  $A_t = A_f + \Delta A_1 \cdot \exp(-k_{\text{obs}}^1 \cdot t) + \Delta A_2 \cdot \exp(-k_{\text{obs}}^2 \cdot t)$
- single exponential  $A_t = A_f + \Delta A_1 \cdot \exp(-k_{\text{obs}}^1 \cdot t)$

## Kinetic Analyses: Figures S1 – S5 and Table S9<sup>1</sup>

Figures S1 – S5 show examples of absorbance-time curves and the kinetic analyses.

Figure S1 Reaction of  $\text{Ni}^{2+}$  ( $0.5 \text{ mmol dm}^{-3}$ ) with  $\text{H}_2\text{L}_\text{H}\text{-Cl}$  ( $1.0 \text{ mmol dm}^{-3}$ )

Figure S2 Reaction of  $\text{Ni}^{2+}$  ( $0.5 \text{ mmol dm}^{-3}$ ) with  $\text{H}_2\text{L}^0_\text{H}$  ( $2.5 \text{ mmol dm}^{-3}$ )

Figure S3 Reaction of  $\text{Ni}^{2+}$  ( $0.5 \text{ mmol dm}^{-3}$ ) with  $\text{L}^3_\text{py}$  ( $5.0 \text{ mmol dm}^{-3}$ )

Figures S1 – S3 show the high quality fits using exponentials, even when the reactions are studied under conditions far from pseudo first-order.

Figure S4a Reaction of  $\text{Ni}^{2+}$  ( $0.5 \text{ mmol dm}^{-3}$ ) with  $\text{H}_2\text{L}_\text{Cl}\text{-Cl}$  ( $4.0 \text{ mmol dm}^{-3}$ ) showing biphasic behaviour and the excellent fit to two exponentials.

Figure S4b Analysis of the data shown in Figure S4a by second order plot<sup>2</sup>, showing the biphasic behaviour is also observed in this analysis and the rate constants derived from the second order analysis are in good agreement with those derived using exponential curve fits.

Figure S4c Same second order analysis as shown in Figure S4b but showing how the straight line fit for the the slow phase extends over long times.

Figure S5a Reaction of  $\text{Ni}^{2+}$  ( $0.5 \text{ mmol dm}^{-3}$ ) with  $\text{H}_2\text{L}^a_\text{Me}$  ( $1.0 \text{ mmol dm}^{-3}$ ) showing biphasic behaviour and the excellent fit to two exponentials.

Figure S5b Analysis of the data shown in Figure S5a by second order plot<sup>2</sup>, showing the biphasic behaviour is difficult to discern in this case because under the conditions used in this experiment the slopes of the fast and slow phases for this plot are very similar.

Figure S5c Reaction of  $\text{Ni}^{2+}$  ( $0.5 \text{ mmol dm}^{-3}$ ) with  $\text{H}_2\text{L}^a_\text{Me}$  ( $3.0 \text{ mmol dm}^{-3}$ ) showing biphasic behaviour and the excellent fit to two exponentials.

Figure S5d Analysis of the data shown in Figure S5c by second order plot<sup>2</sup>, showing the biphasic behaviour is also observed in this analysis and the rate constants derived from the second order analysis are in good agreement with those derived using exponential curve fits.

Table S9 Table showing the calculated ‘reacting concentrations’ ( $[\text{Ni}^{2+}]_r$ ) in the equilibrium reactions of  $\text{Ni}^{2+}$  with  $\text{H}_2\text{L}_\text{X}\text{-Cl}$ ,  $\text{H}_2\text{L}^a_\text{X}$ ,  $\text{H}_2\text{L}^0_\text{X}$  and  $\text{H}_2\text{salphen}$  ( $[\text{Ni}^{2+}]_0 = 0.5 \text{ mmol dm}^{-3}$ ,  $[\text{ligand}]_0 = 1.0 \text{ mmol dm}^{-3}$ ).

### Footnotes

1. The values of the rate constants presented in the text and Tables 5 and 6 are derived from exponential fits to the absorbance-time curves.

[continued....

2. Second order analysis for the reactions of  $\text{Ni}^{2+}$  with ligand (L) when the concentrations of the two reactants are similar (not pseudo first-order conditions), are plots of  $\log_e \{[\text{L}]_t/[\text{Ni}^{2+}]_t\}$  versus time when  $[\text{L}]_0 > [\text{Ni}^{2+}]_0$  (subscript t = at time t, and 0 = at time t = 0).

Using Beer's Law (where  $A_f$  = final absorbance,  $A_i$  = initial absorbance and  $A_t$  = absorbance at time t) it can be shown that:

$$\text{plot of } \log_e \left\{ \frac{[\text{L}]_t}{[\text{Ni}^{2+}]_t} \right\} \text{ versus time} =$$

$$\text{plot of } \log_e \left\{ \frac{(A_f - A_i)[\text{L}]_0 - (A_t - A_i)[\text{Ni}^{2+}]_0}{(A_f - A_t)[\text{Ni}^{2+}]_0} \right\} \text{ versus time}$$

**Figure S1.** Stopped-flow absorbance-time curve for the reaction of  $\text{Ni}^{2+}$  ( $0.5 \text{ mmol dm}^{-3}$ ) with  $\text{H}_2\text{L}_\text{H}\text{-Cl}$  ( $1.0 \text{ mmol dm}^{-3}$ ) showing good fit to a single exponential curve. Experimental data is shown in black and the superimposed single exponential curve fit is shown in grey. The equation of the curve fit used is  $A_t = 0.483 - 0.21e^{-0.12t}$  (see Table S4).

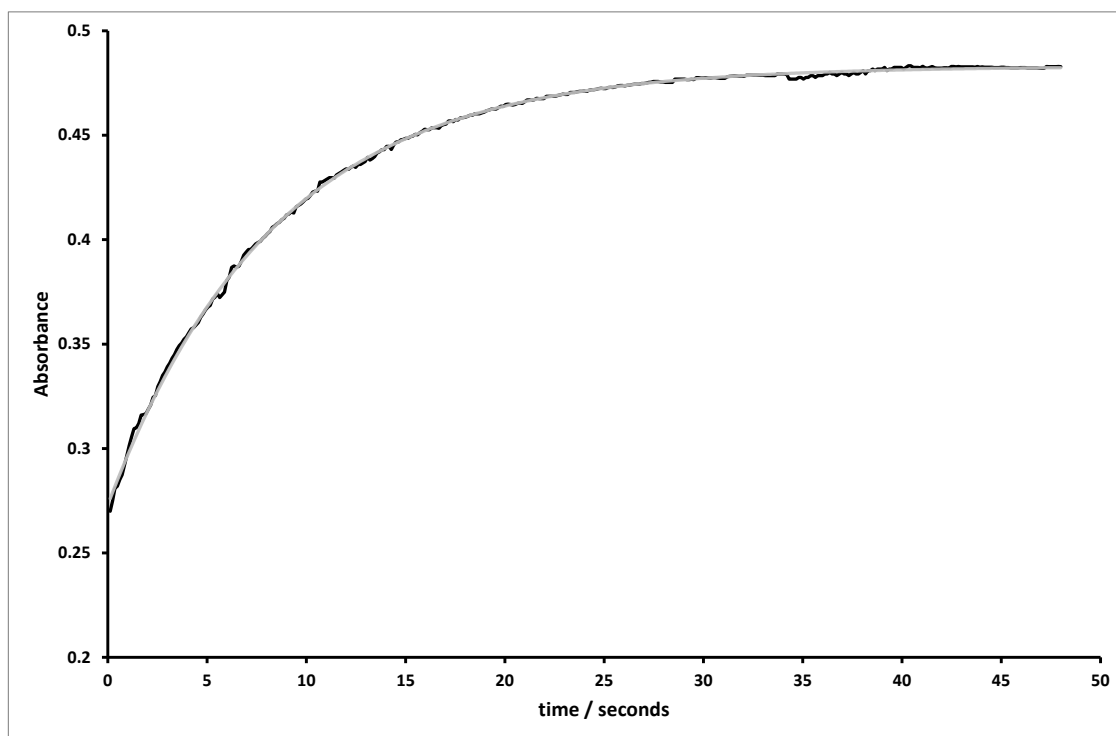

**Figure S2.** Stopped-flow absorbance-time curve for the reaction of  $\text{Ni}^{2+}$  ( $0.5 \text{ mmol dm}^{-3}$ ) with  $\text{H}_2\text{L}_\text{H}^0$  ( $2.5 \text{ mmol dm}^{-3}$ ) in presence of  $\text{NHET}_3^+$  ( $5.0 \text{ mmol dm}^{-3}$ ) and  $\text{NEt}_3$  ( $10 \text{ mmol dm}^{-3}$ ) showing good fit to a single exponential curve. Experimental data is shown in black and the superimposed single exponential curve fit is shown in grey. The equation of the curve fit used is  $A_t = 0.756 - 0.233e^{-9.2t}$  (see Table S8).

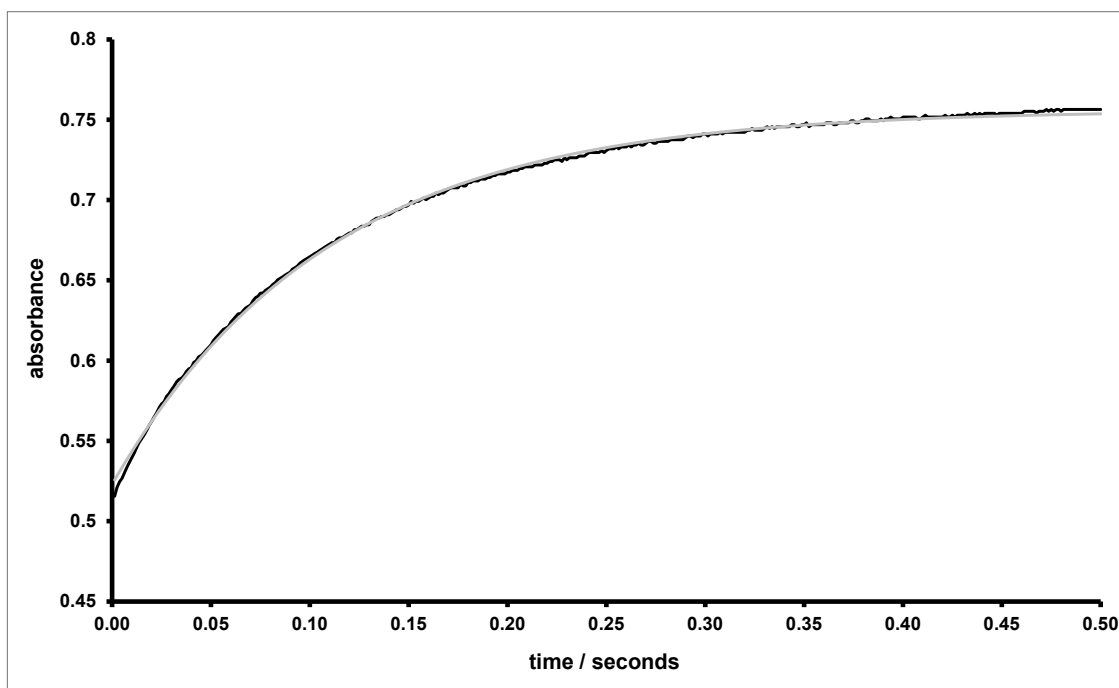

**Figure S3.** Stopped-flow absorbance-time curve for the reaction of  $\text{Ni}^{2+}$  ( $0.5 \text{ mmol dm}^{-3}$ ) with  $\text{L}^3_{\text{py}}$  ( $5.0 \text{ mmol dm}^{-3}$ ) showing good fit to a single exponential curve. Experimental data is shown in black and the superimposed single exponential curve fit is shown in grey. The equation of the curve fit used is  $A_t = 0.059 - 0.215e^{-17.9t}$  (see Table S7).

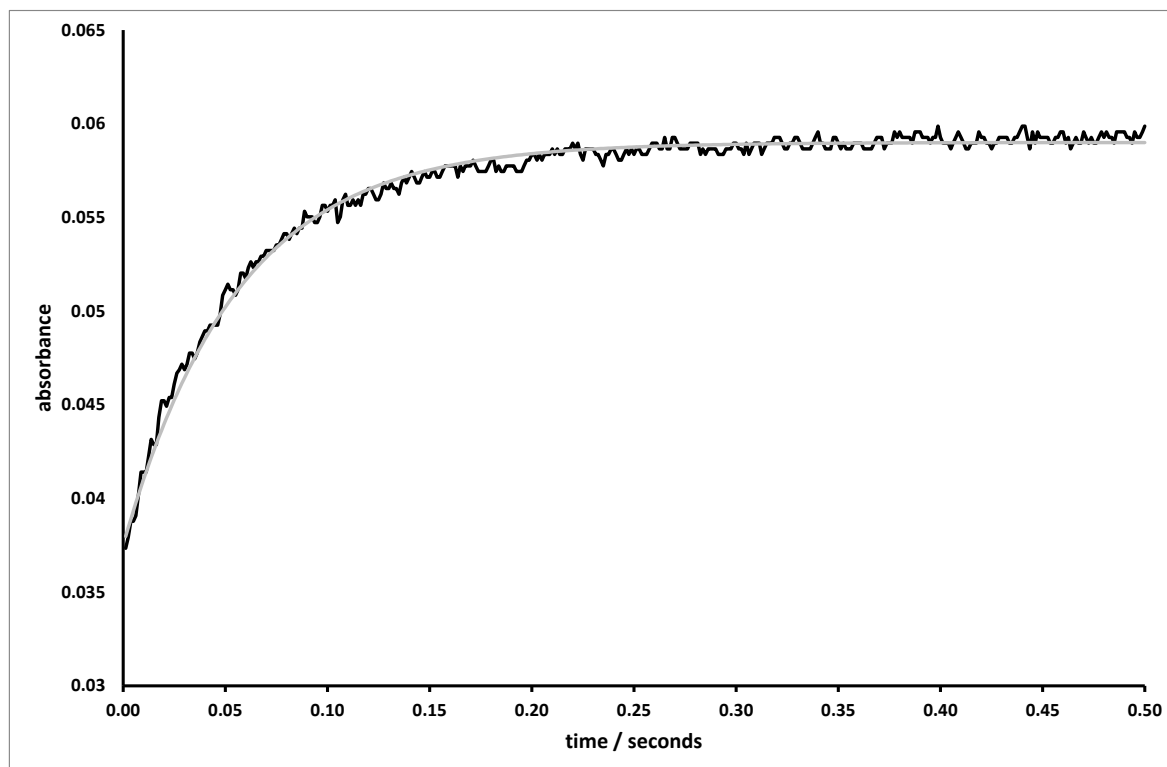

**Figure S4a.** Stopped-flow absorbance-time curve for the reaction of  $\text{Ni}^{2+}$  ( $0.5 \text{ mmol dm}^{-3}$ ) with  $\text{H}_2\text{L}_{\text{Cl}}\text{-Cl}$  ( $4.0 \text{ mmol dm}^{-3}$ ) showing good fit to a two exponential curves. Experimental data is shown in black and the superimposed two exponential curve fit is shown in grey. The equation of the curve fit used is  $A_t = 1.43 - 0.413e^{-0.35t} - 0.673e^{-0.04t}$  (see Table S4).

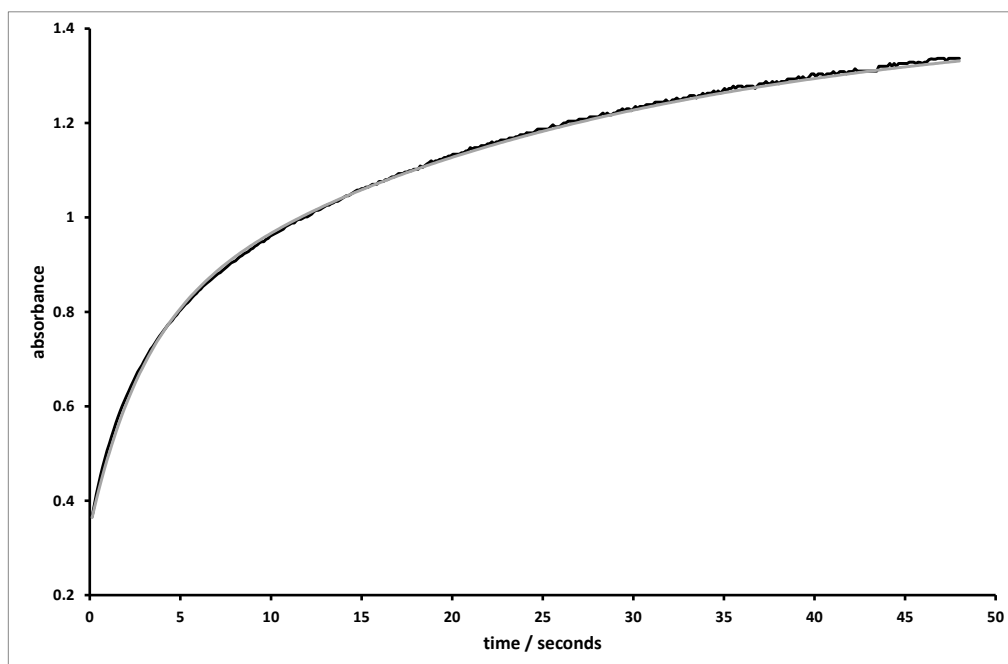

**Figure S4b.** Second order kinetic analysis for the reaction of  $\text{Ni}^{2+}$  ( $0.5 \text{ mmol dm}^{-3}$ ) with  $\text{H}_2\text{L}_{\text{Cl}}\text{-Cl}$  ( $4.0 \text{ mmol dm}^{-3}$ ). Experimental data is shown in black and the tangential lines are drawn for the two phases (red line = slow phase,  $\log_e \{[\text{H}_2\text{L}_{\text{Cl}}\text{-Cl}]_t / [\text{Ni}^{2+}]_t\} = 2.45 + 0.04t$ ; green line = fast phase,  $[\text{H}_2\text{L}_{\text{Cl}}\text{-Cl}]_t / [\text{Ni}^{2+}]_t = 2.08 + 0.13t$ ). Rate constant for slow phase (independent of  $[\text{H}_2\text{L}_{\text{Cl}}\text{-Cl}]$ ),  $k_b = 0.04 \text{ s}^{-1}$ ; rate constant for fast phase (dependent on  $[\text{H}_2\text{L}_{\text{Cl}}\text{-Cl}]$ ),  $k_a = \text{slope} / ([\text{H}_2\text{L}_{\text{Cl}}\text{-Cl}]_0 - [\text{Ni}^{2+}]_0) = 0.13 / 3.5 \times 10^{-3} = 37.1 \text{ dm}^3 \text{ mol}^{-1} \text{ s}^{-1}$ . The values of both  $k_a$  and  $k_b$  from this analysis are in good agreement with the values determined using exponential curve fits (see Table 5). Note that the deviations from linearity (red line) occur for up to 10 s. This corresponds to about 57% of the total absorbance change (see Fig S4a).

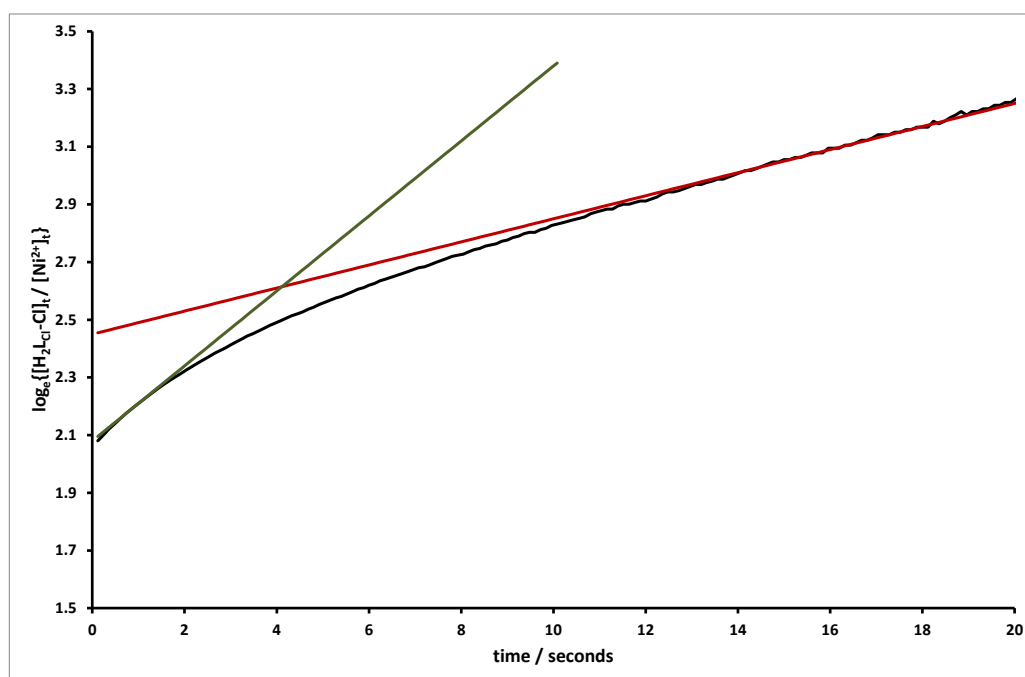



**Figure S4c.** Second order kinetic analysis for the reaction of  $\text{Ni}^{2+}$  ( $0.5 \text{ mmol dm}^{-3}$ ) with  $\text{H}_2\text{L}_{\text{Cl}}\text{-Cl}$  ( $4.0 \text{ mmol dm}^{-3}$ ). Same data as in Figure S4b but showing goodness of fit of the line  $\log_e\{[\text{H}_2\text{L}_{\text{Cl}}\text{-Cl}]_t/[\text{Ni}^{2+}]_t\} = 2.45 + 0.04t$  for the slow phase over extended times. Experimental data is shown in black and the straight line fit is shown in red (see Table 5).

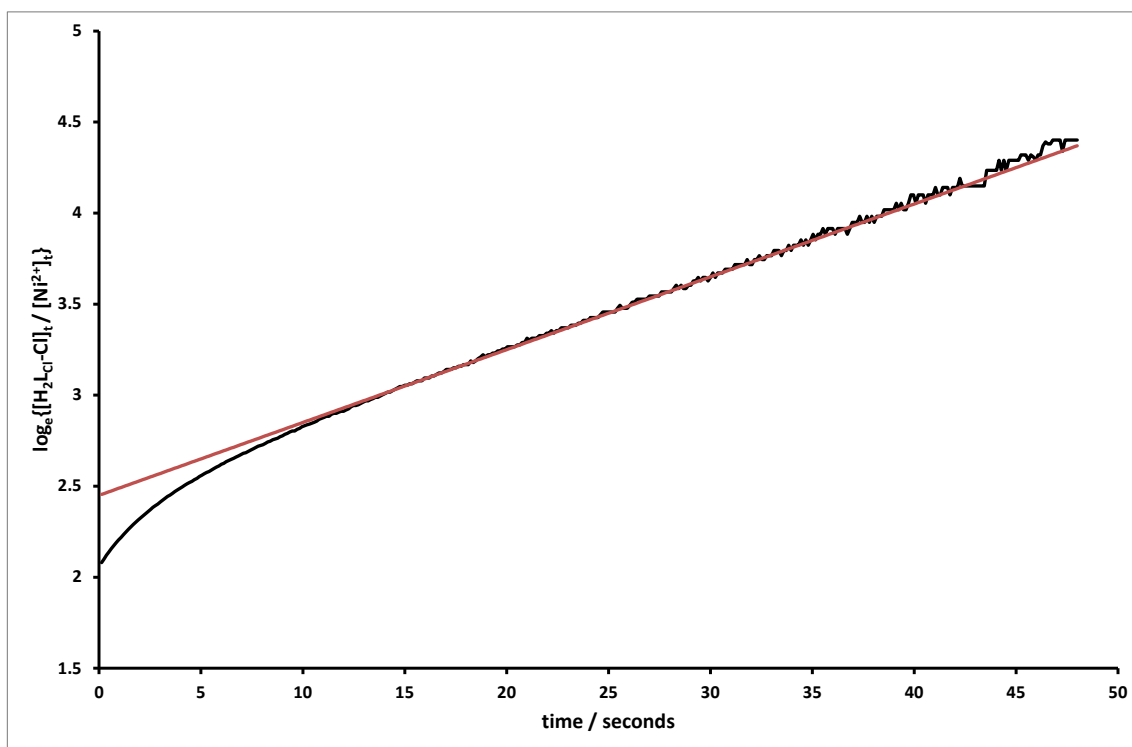

**Figure S5a.** Stopped-flow absorbance-time curve for the reaction of  $\text{Ni}^{2+}$  ( $0.5 \text{ mmol dm}^{-3}$ ) with  $\text{H}_2\text{L}^{\text{a}}_{\text{Me}}$  ( $1.0 \text{ mmol dm}^{-3}$ ) showing good fit to a two exponential curves. Experimental data is shown in black and the superimposed two exponential curve fit is shown in grey. The equation of the curve fit used is  $A_t = 0.665 - 0.10e^{-0.45t} - 0.14e^{-0.06t}$  (see Table S3).

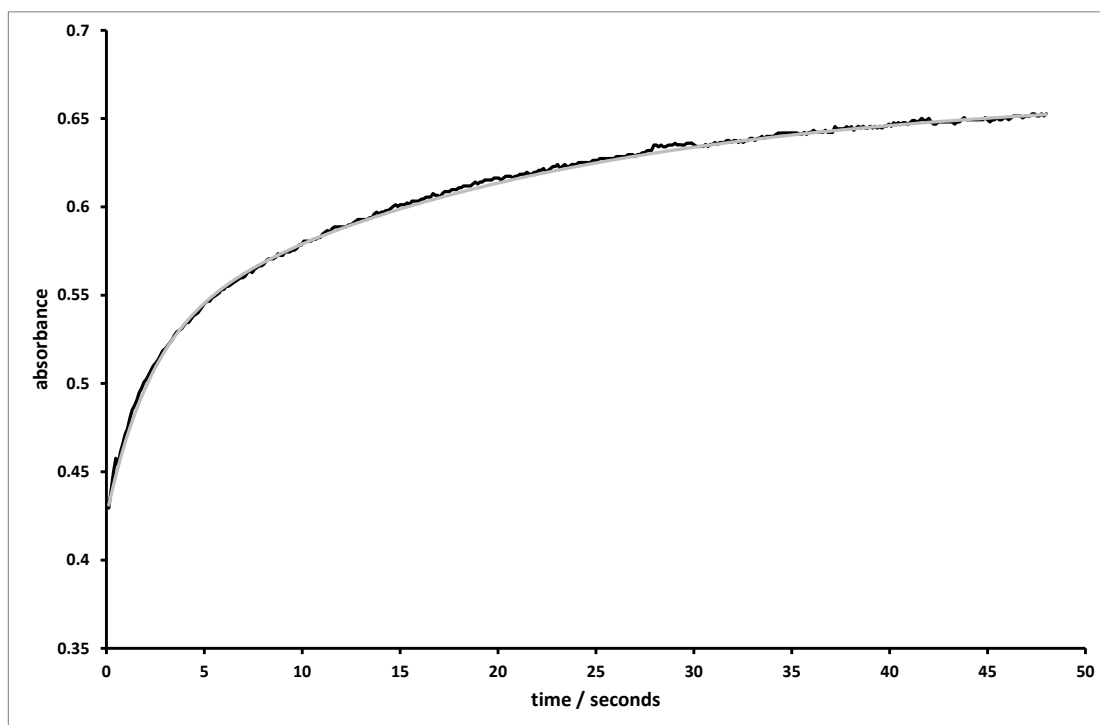

**Figure S5b.** Second order kinetic analysis for the reaction of  $\text{Ni}^{2+}$  ( $0.5 \text{ mmol dm}^{-3}$ ) with  $\text{H}_2\text{L}^{\text{a}}_{\text{Me}}$  ( $1.0 \text{ mmol dm}^{-3}$ ). Experimental data is shown in black and the straight line drawn is,  $\log_e\{[\text{H}_2\text{L}^{\text{a}}_{\text{Me}}]_t/[\text{Ni}^{2+}]_t\} = 0.85 + 0.045t$ . Note the small deviation from the straight line at the beginning, because under the conditions used in this experiment the slopes of the fast and slow phases for this plot are very similar (calculated slope for fast phase =  $0.044 \text{ s}^{-1}$ ; slope for slow phase =  $0.060 \text{ s}^{-1}$ ).

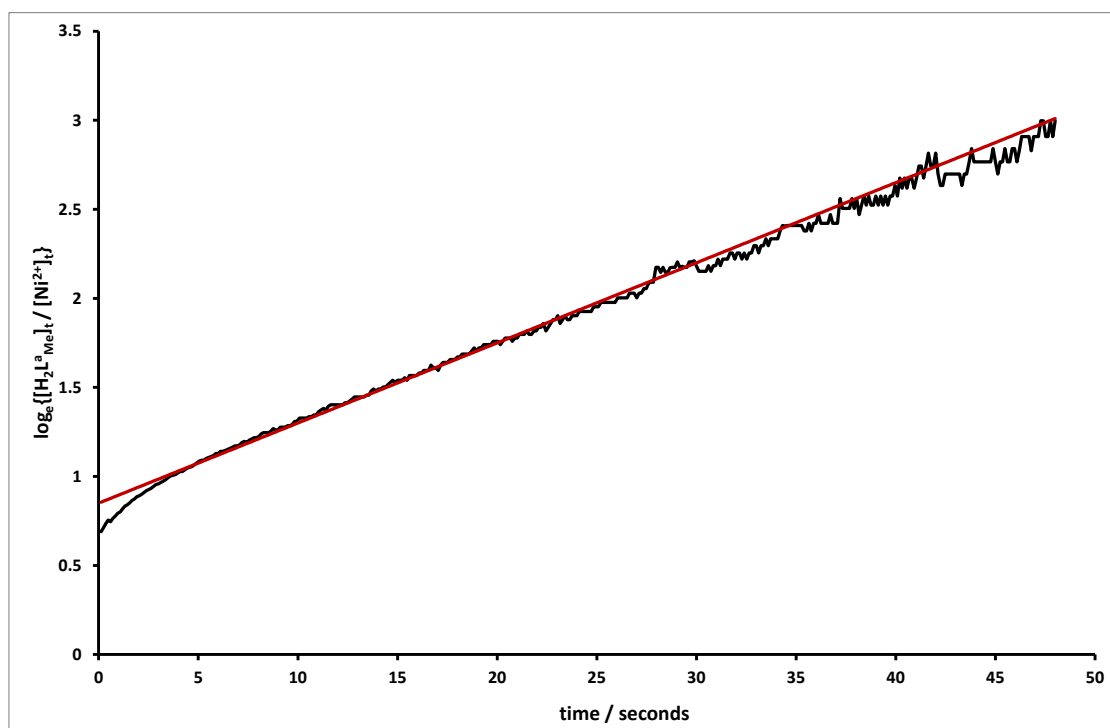

**Figure S5c.** Stopped-flow absorbance-time curve for the reaction of  $\text{Ni}^{2+}$  ( $0.5 \text{ mmol dm}^{-3}$ ) with  $\text{H}_2\text{L}^{\text{a}}_{\text{Me}}$  ( $3.0 \text{ mmol dm}^{-3}$ ) showing good fit to a two exponential curves. Experimental data is shown in black and the superimposed two exponential curve fit is shown in grey. The equation of the curve fit used is  $A_t = 1.695 - 0.27e^{-0.61t} - 0.30e^{-0.07t}$  (see Table S3).

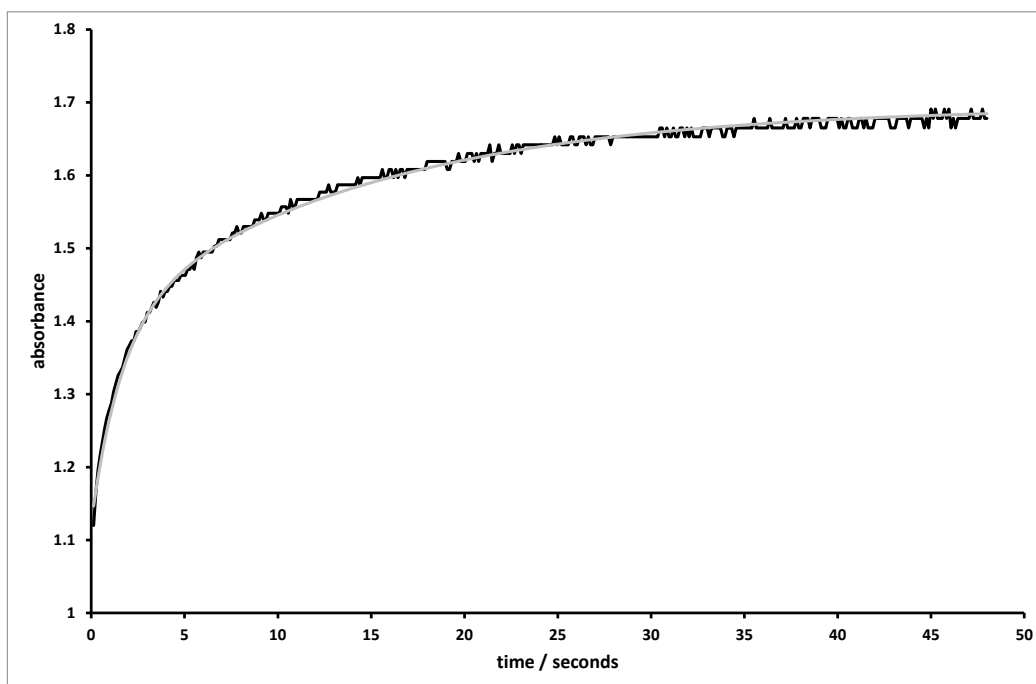

**Figure S5d.** Second order kinetic analysis for the reaction of  $\text{Ni}^{2+}$  ( $0.5 \text{ mmol dm}^{-3}$ ) with  $\text{H}_2\text{L}^{\text{a}}_{\text{Me}}$  ( $3.0 \text{ mmol dm}^{-3}$ ). Experimental data is shown in black and the tangential lines are drawn for the two phases (red line = slow phase,  $\log_e \{[\text{H}_2\text{L}^{\text{a}}_{\text{Me}}]_t / [\text{Ni}^{2+}]_t\} = 2.5 + 0.06t$ ; green line = fast phase,  $[\text{H}_2\text{L}^{\text{a}}_{\text{Me}}]_t / [\text{Ni}^{2+}]_t = 1.85 + 0.21t$ ). Rate constant for slow phase (independent of  $[\text{H}_2\text{L}^{\text{a}}_{\text{Me}}]$ ),  $k_b = 0.06 \text{ s}^{-1}$ ; rate constant for fast phase (dependent on  $[\text{H}_2\text{L}^{\text{a}}_{\text{Me}}]$ ),  $k_a = \text{slope} / ([\text{H}_2\text{L}^{\text{a}}_{\text{Me}}]_0 - [\text{Ni}^{2+}]_0) = 0.21 / 2.5 \times 10^{-3} = 84 \text{ dm}^3 \text{ mol}^{-1} \text{ s}^{-1}$ . The values of both  $k_a$  and  $k_b$  from this analysis are in good agreement with the values determined using exponential curve fits (see Table 5). Note that the two phases are more evident in this plot than in Fig S5b, because under the conditions used in this experiment the slopes of the fast and slow phases for this plot are significantly different.

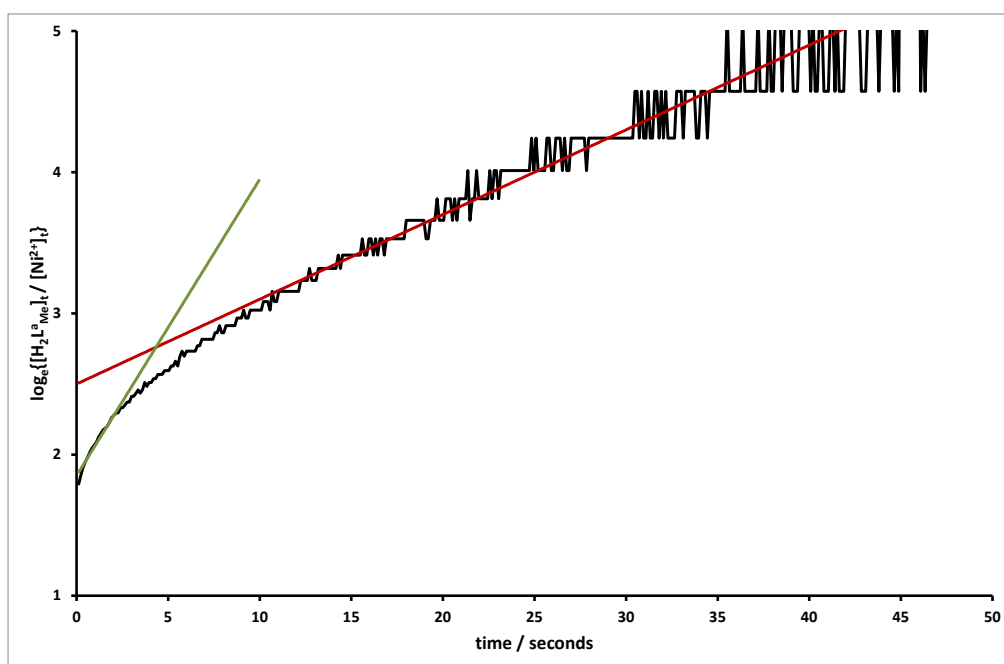

**Table S9.**

Comparison of the added concentrations ( $[\text{Ni}^{2+}]_0 = 0.5 \text{ mmol dm}^{-3}$ ) with the reacting concentrations ( $[\text{Ni}^{2+}]_r$ ) for the equilibrium reactions of  $\text{Ni}^{2+}$  with  $\text{H}_2\text{L}_X\text{-Cl}$ ,  $\text{H}_2\text{L}^a_X$ ,  $\text{H}_2\text{L}^0_X$  and  $\text{H}_2\text{salphen}$  ( $[\text{ligand}]_0 = 1.0 \text{ mmol dm}^{-3}$ ).

| Ligand                              | $K_a^1 / \text{dm}^3 \text{ mol}^{-1}$ | $[\text{Ni}^{2+}]_r / \text{mmol dm}^{-3}$ | $[\text{ligand}]_0 / [\text{Ni}^{2+}]_r$ |
|-------------------------------------|----------------------------------------|--------------------------------------------|------------------------------------------|
| $\text{H}_2\text{L}^a_{\text{H}}$   | 863                                    | 0.20                                       | 5.0                                      |
| $\text{H}_2\text{L}^a_{\text{Me}}$  | 250                                    | 0.092                                      | 10.9                                     |
| $\text{H}_2\text{L}^a_{\text{Cl}}$  | 813                                    | 0.20                                       | 5.0                                      |
| $\text{H}_2\text{L}_{\text{H-Cl}}$  | 46                                     | 0.025                                      | 40.0                                     |
| $\text{H}_2\text{L}_{\text{Me-Cl}}$ | 1485                                   | 0.26                                       | 4.0                                      |
| $\text{H}_2\text{L}_{\text{Cl-Cl}}$ | 147                                    | 0.060                                      | 16.7                                     |
| $\text{H}_2\text{L}^0_{\text{H}}$   | 260                                    | 0.086                                      | 11.6                                     |
| $\text{H}_2\text{L}^0_{\text{MeO}}$ | 393                                    | 0.128                                      | 7.8                                      |
| $\text{H}_2\text{L}^0_{\text{Me}}$  | 110                                    | 0.047                                      | 21.3                                     |
| $\text{H}_2\text{L}^0_{\text{Cl}}$  | 923                                    | 0.21                                       | 5.0                                      |
| $\text{H}_2\text{salphen}$          | 400                                    | 0.13                                       | 7.7                                      |

footnotes

1.  $K_a = k_a / k_{-a}$  (values shown in Table 5)
